# Supplementary material for: Amylomaltases in Extremophilic Microorganisms
Source: MDPI journal article supplement (doi:10.3390/biom11091335), 2021-09-09
Supplement: s1 [file s1]

## Supplementary Material

# Amylomaltases in Extremophilic Microorganisms

Claudia Leoni <sup>1</sup>, Bruno A.R. Gattulli <sup>1</sup>, Graziano Pesole <sup>1,2</sup>, Luigi R. Ceci <sup>1,\*</sup> and Mariateresa Volpicella <sup>1,2,\*</sup>

<sup>1</sup> Institute of Biomembranes, Bioenergetics and Molecular Biotechnologies, Consiglio Nazionale delle Ricerche, Via Amendola, 70126 Bari, Italy; c.leoni@ibiom.cnr.it (C.L.); b.gattulli@ibiom.cnr.it (B.A.R.G.); graziano.pesole@uniba.it (G.P.)

<sup>2</sup> Department of Biosciences, Biotechnologies and Biopharmaceutics, University of Bari Aldo Moro, Via Amendola 165/A, 70126 Bari, Italy

\* Correspondence: l.ceci@ibiom.cnr.it, Tel.: +39-080-544-3311 (L.R.C.); mariateresa.volpicella@uniba.it, Tel.: +39-080-544-3311 (M.V.)

## Content

- Table S1: Percent Identity Matrix.
- Table S2: Amino acids of conserved regions in amylomaltases.

**Table S1. Percent Identity Matrix**

|               | 1      | 2      | 3      | 4      | 5      | 6      | 7      | 8      | 9      | 10     | 11     |
|---------------|--------|--------|--------|--------|--------|--------|--------|--------|--------|--------|--------|
| 1: Q1J0L5     | 100.00 | 53.65  | 55.87  | 55.26  | 56.48  | 56.48  | 56.07  | 44.61  | 47.28  | 45.16  | 45.16  |
| 2: A0A0K0Q020 |        | 100.00 | 72.78  | 70.52  | 72.58  | 72.58  | 71.55  | 46.30  | 48.62  | 46.84  | 46.41  |
| 3: Q2VJA0     |        |        | 100.00 | 83.40  | 86.80  | 86.80  | 86.40  | 46.67  | 47.38  | 47.20  | 45.47  |
| 4: Q6JHX9     |        |        |        | 100.00 | 87.40  | 87.40  | 84.60  | 45.83  | 46.96  | 47.84  | 45.26  |
| 5: Q5SIV3     |        |        |        |        | 100.00 | 99.80  | 88.00  | 46.46  | 47.38  | 47.20  | 45.26  |
| 6: O87172     |        |        |        |        |        | 100.00 | 88.00  | 46.46  | 47.38  | 47.20  | 45.26  |
| 7: A0A430UEB1 |        |        |        |        |        |        | 100.00 | 45.21  | 47.59  | 47.84  | 45.91  |
| 8: O66937     |        |        |        |        |        |        |        | 100.00 | 46.86  | 46.67  | 45.59  |
| 9: F2L2Q5     |        |        |        |        |        |        |        |        | 100.00 | 62.63  | 58.84  |
| 10: A3MU77    |        |        |        |        |        |        |        |        |        | 100.00 | 75.11  |
| 11: Q8ZXM0    |        |        |        |        |        |        |        |        |        |        | 100.00 |

Percent Identity Matrix, as obtained by Clustal 2.1. In red identity values among archaeal and bacterial sequences.

**Table S2. Amino acids of conserved regions in amylomaltases.** Only some representative bacterial (cyan background) and archaeal (green background) enzymes have been reported. Entries with a white background are related to enzymes from mesophilic *Bacteria* used for comparison in this review. Letters after the name of the organism refer to its classification as Hyperthermophiles (H), Thermophiles (T), Halophiles (Ha) or Mesophiles (M).

|                                                                              | O87172                    | Q8ZXM0                  | MZ422727              | A0A0E1EIJ0              | A0LVB3                      | Q8NNA7                  |
|------------------------------------------------------------------------------|---------------------------|-------------------------|-----------------------|-------------------------|-----------------------------|-------------------------|
| Organism                                                                     | <i>T. thermophilus</i> /T | <i>P. aerophilum</i> /H | <i>H. walsbyi</i> /Ha | <i>S. agalactiae</i> /M | <i>A. cellulolyticus</i> /T | <i>C. glutamicum</i> /M |
| REGION                                                                       |                           |                         |                       |                         |                             |                         |
| ACTIVE SITE                                                                  |                           |                         |                       |                         |                             |                         |
| i) Catalytic residues                                                        | D293                      | D271                    | D345                  | D295                    | D467                        | D460                    |
|                                                                              | E340                      | E318                    | E392                  | E342                    | E515                        | E508                    |
|                                                                              | D395                      | D371                    | D445                  | D396                    | D567                        | D561                    |
| ii) Four conserved amino acids for substrate binding                         | Y59                       | Y59                     | Y61                   | Y58                     | --                          | --                      |
|                                                                              | D213                      | D191                    | D266                  | D215                    | D393                        | D386                    |
|                                                                              | R291                      | R269                    | R343                  | R293                    | R465                        | R458                    |
|                                                                              | H394                      | H370                    | H444                  | H395                    | H566                        | H560                    |
| iii) Other conserved amino acids of the active site                          | F217                      | Y195                    | Y270                  | Y219                    | G397                        | G390                    |
|                                                                              | W258                      | W236                    | W310                  | W260                    | W432                        | W425                    |
|                                                                              | H294                      | H272                    | H346                  | H296                    | H468                        | H461                    |
|                                                                              | L342                      | L320                    | L394                  | L344                    | L517                        | L510                    |
|                                                                              | N464                      | N434                    | N508                  | N460                    | N715                        | N661                    |
| iv) Conserved amino acids forming part of the cleft around the active center | S57                       | S57                     | S59                   | S56                     | --                          | --                      |
|                                                                              | P58                       | P58                     | P60                   | P57                     | --                          | --                      |
|                                                                              | D341                      | D319                    | D393                  | N343                    | D516                        | D516                    |
|                                                                              | G343                      | G321                    | G395                  | G345                    | G518                        | G518                    |
|                                                                              | T393                      | T369                    | T443                  | T394                    | T565                        | T565                    |
|                                                                              | P466                      | P436                    | P510                  | P462                    | P717                        | P717                    |
| 250s LOOP                                                                    | P247                      | P225                    | P300                  | P249                    | P421                        | P414                    |
|                                                                              | P248                      | P226                    | P301                  | A250                    | A422                        | P415                    |
|                                                                              | D249                      | D227                    | T302                  | D251                    | D423                        | D416                    |
|                                                                              | Y250                      | Y228                    | D303                  | D252                    | M424                        | G417                    |
|                                                                              | F251                      | F229                    | --                    | F253                    | Y425                        | Y418                    |
|                                                                              | S252                      | S230                    | S304                  | S254                    | N426                        | N419                    |
|                                                                              | E253                      | A231                    | D305                  | D255                    | Q427                        | Q420                    |
|                                                                              | T254                      | T232                    | D306                  | D256                    | Q428                        | Q421                    |
|                                                                              | G255                      | G233                    | G307                  | G257                    | G429                        | G422                    |
|                                                                              | W302                      | W280                    | Y354                  | W304                    | W476                        | F469                    |
| SECONDARY SUBSTRATE BINDING SITE                                             | Y54                       | Y54                     | H56                   | F53                     | --                          | --                      |
|                                                                              | Y101                      | W101                    | R107                  | F105                    | W280                        | Y290                    |
|                                                                              | Y465                      | R435                    | E509                  | M461                    | Q716                        | Q662                    |
